# Supplementary material for: Integration of inverse nanocone array based bismuth vanadate photoanodes and bandgap-tunable perovskite solar cells for efficient self-powered solar water splitting
Source: Royal Society of Chemistry journal article supplement (doi:10.1039/c7ta06309a), 2017-01-01
Supplement: c7ta06309a1.pdf [file c7ta06309a1.pdf]

## Supplementary Information

### **Integration of Inverse Nanocone Array based Bismuth Vanadate Photoanodes and Bandgap-Tunable Perovskite Solar Cells for Efficient Self-Powered Solar Water Splitting**

Shuang Xiao,<sup>a,b,c†</sup> Chen Hu,<sup>a,†</sup> He Lin,<sup>a</sup> Xiangyue Meng,<sup>a</sup> Yang Bai,<sup>a</sup> Teng Zhang,<sup>a</sup> Yinglong Yang,<sup>a</sup> Yongquan Qu,<sup>c</sup> Keyou Yan,<sup>d</sup> Jianbin Xu,<sup>d</sup> Yongcai Qiu,<sup>a,d,e,\*</sup> Shihe Yang<sup>a,b\*</sup>

<sup>a</sup>Department of Chemistry, The Hong Kong University of Science and Technology, Clear Water Bay, Kowloon, Hong Kong, China

<sup>b</sup>Guangdong Key Lab of Nano-Micro Material Research, School of Chemical Biology and Biotechnology, Shenzhen Graduate School, Peking University, Shenzhen, China.

<sup>c</sup>Joint School of Sustainable Development and Frontier Institute of Science and Technology, Xi'an Jiaotong University, Yan Xiang Road, Xi'an, China

<sup>d</sup>Department of Electronic Engineering, The Chinese University of Hong Kong, Shatin, New Territories, Hong Kong, China

<sup>e</sup>College of Environment and Energy, South China University of Technology, Guangzhou, China

\*CORRESPONDING AUTHOR E-mail: ([chqiuyc@gmail.com](mailto:chqiuyc@gmail.com); [chsyang@ust.hk](mailto:chsyang@ust.hk))

<sup>†</sup> These authors contribute equally to this work.

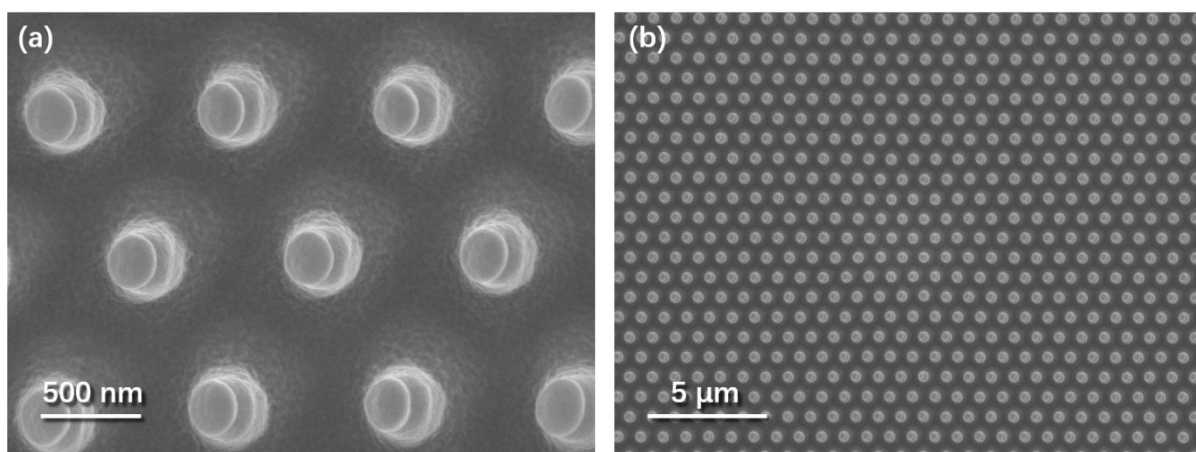

**Fig. S1.** SEM images of PDMS mold. (a) High magnified image shows the pitch has a cone-like shape. (b) Low magnified image shows that the nanocone array on PDMS mold is highly ordered in a large scale.

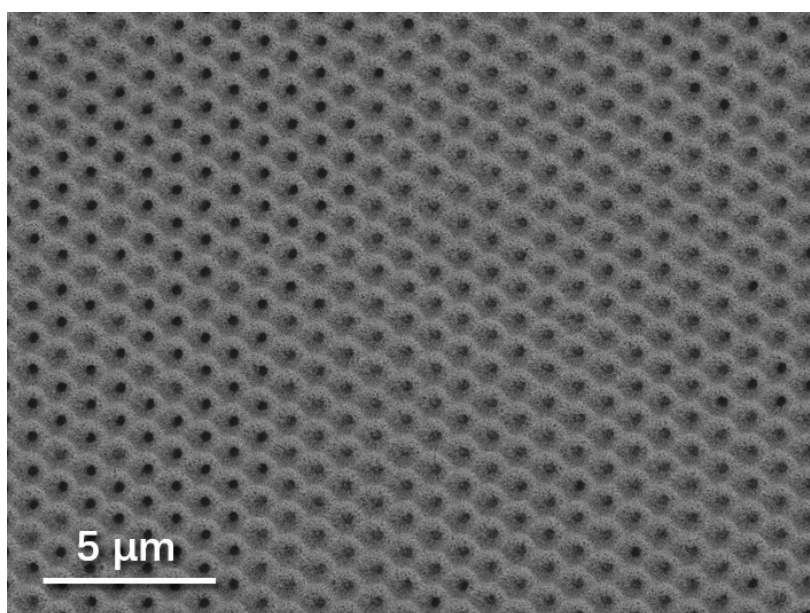

**Fig. S2.** SEM image of 3D ICA-TiO<sub>2</sub>, showing that the ICA structure is highly ordered in a large scale.

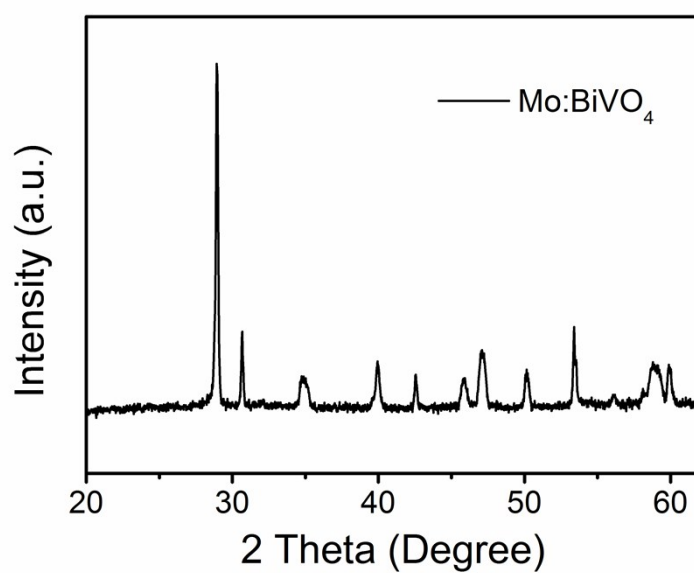

**Fig. S3.** The XRD pattern of the Mo:BiVO<sub>4</sub> deposited by the sol-gel method.

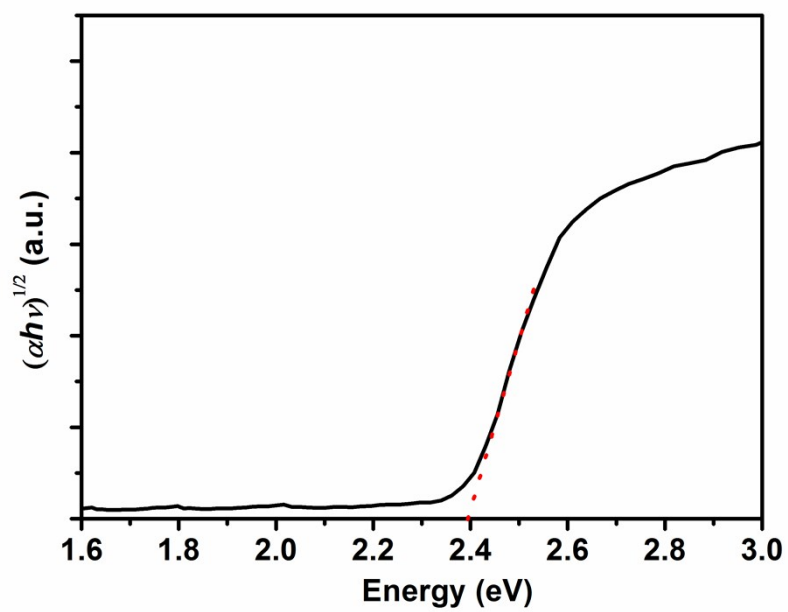

**Fig. S4.** The absorption curve of monolithic Mo:BiVO<sub>4</sub> of  $(\alpha h\nu)^{1/2}$  versus photon energy ( $h\nu$ ). The estimated bandgap is around 2.4 eV.

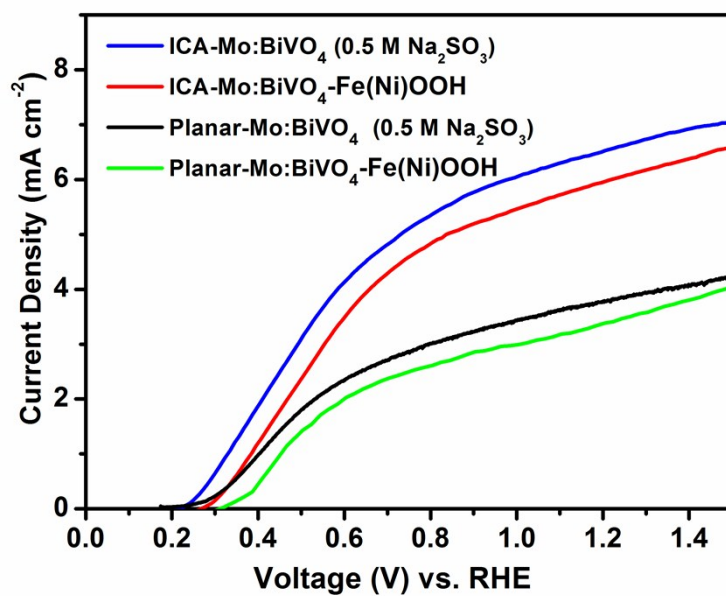

**Fig. S5.**  $J$ - $V$  curves of the ICA-Mo:BiVO<sub>4</sub> in KPH buffer solution with hole scavenger (blue line), the ICA-Mo:BiVO<sub>4</sub>-Fe(Ni)OOH in KPH buffer solution (red line), the planar-Mo:BiVO<sub>4</sub> in KPH buffer solution with hole scavenger (black line) and the planar-Mo:BiVO<sub>4</sub>-Fe(Ni)OOH in KPH buffer solution (green line).

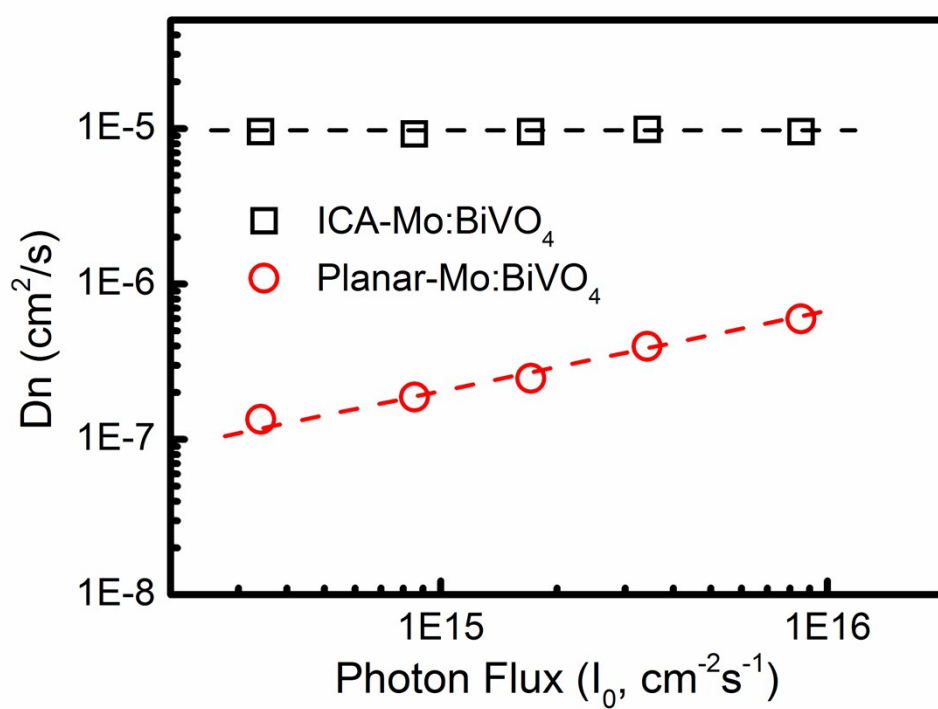

**Fig. S6.** Intensity modulated photocurrent spectroscopy (IMPS) tests for the ICA-Mo:BiVO<sub>4</sub> in KPH buffer solution with hole scavenger (black dashed line) and the planar-Mo:BiVO<sub>4</sub> in KPH buffer solution with hole scavenger (red dashed line).

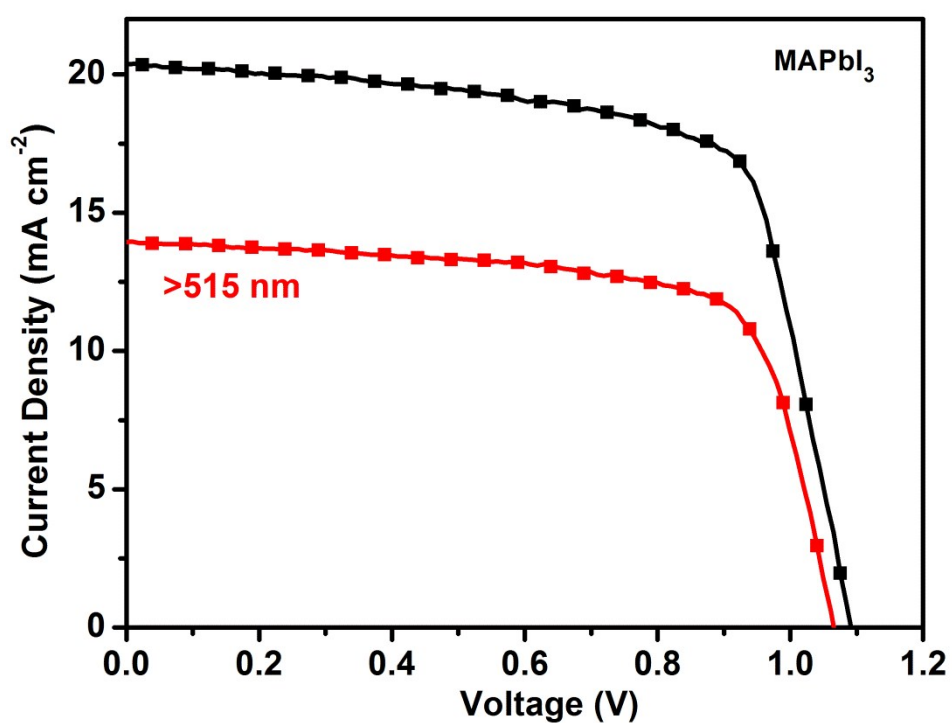

**Fig. S7.**  $J$ - $V$  curves of the NiO-based inverted MAPbI<sub>3</sub> PSCs. Black: tested in the entire wavelength region at 1 Sun; Red: tested in the wavelength region of >515 nm. The  $V_{oc}$  has a 25 mV deduction from 1.090 to 1.065 V and  $J_{sc}$  varies from 20.3 mA cm<sup>-2</sup> to 14.0 mA cm<sup>-2</sup>.

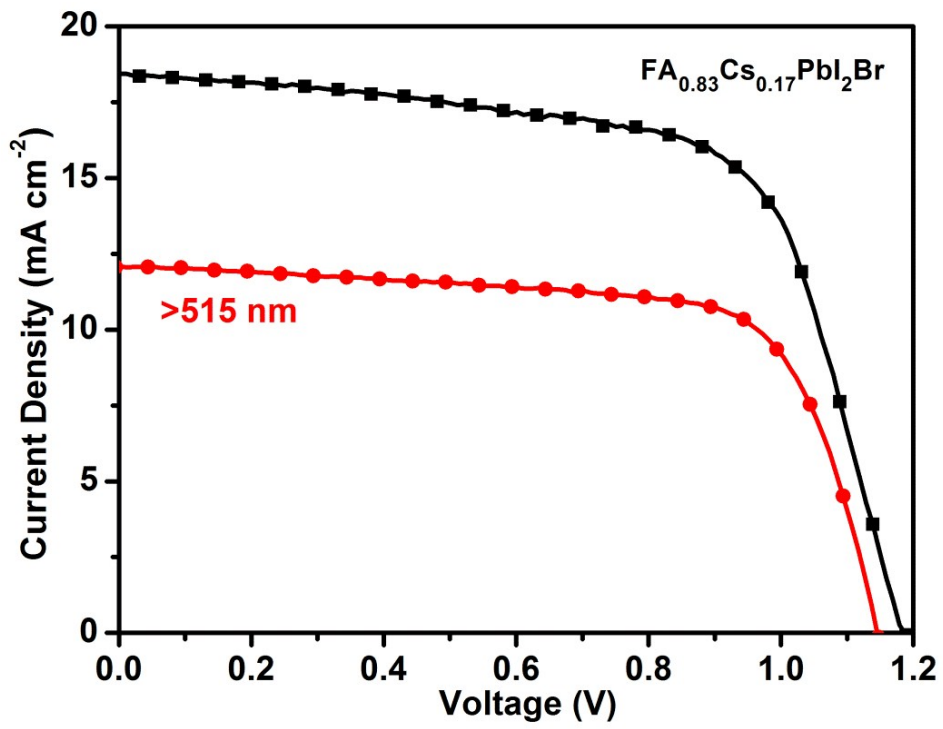

**Fig. S8.**  $J$ - $V$  curves of the NiO-based inverted  $\text{FA}_{0.83}\text{Cs}_{0.17}\text{PbI}_2\text{Br}$  PSCs. Black: tested in the entire wavelength region at 1 Sun; Red: tested in the wavelength region of  $>515$  nm. The  $V_{\text{oc}}$  has a 39 mV deduction from 1.184 to 1.145 V and  $J_{\text{sc}}$  varies from  $18.4 \text{ mA cm}^{-2}$  to  $12.1 \text{ mA cm}^{-2}$ .

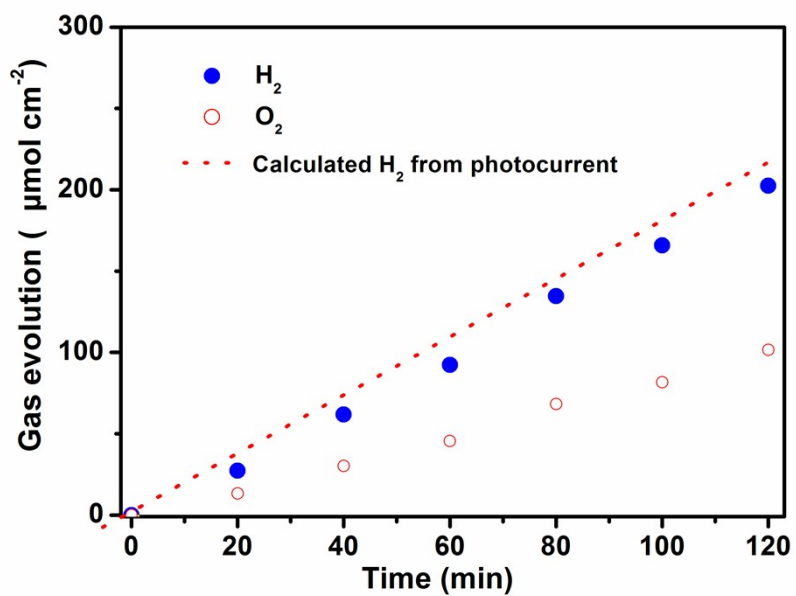

**Fig. S9.**  $\text{H}_2$  and  $\text{O}_2$  production from the tandem device and its theoretical gas production rate of the tandem device.
